# Supplementary material for: The Utilization of Protective Face Masks among Polish Healthcare Workers during COVID-19 Pandemic: Do We Pass the Exam?
Source: MDPI journal article supplement (doi:10.3390/ijerph18020841), 2021-01-19
Supplement: s1 [file s1]

# **The use of face masks during COVID-19 pandemic among healthcare workers**

**1. What is your primary workplace?**

- a. Internal medicine ward
- b. Surgery ward
- c. Anesthesiology or infectious diseases ward
- d. Outpatient department

**2. What is your profession?**

- a. Physician
- b. Nurse
- c. Miscellaneous medical personnel

**3. How many years have you been working in healthcare? .....**

**4. Age: .....**

**5. Sex:**

- a. Female
- b. Male

**6. Do you have a sensitive skin?**

- a. Yes
- b. No

**7. Do you have an individual or family predisposition to atopic diseases (history of atopic dermatitis, allergic rhinitis, allergic conjunctivitis etc.)?**

- a. Yes
- b. No

8. Do you currently suffer from facial skin lesions (e.g. acne, seborrhoeic dermatitis, atopic dermatitis, etc.)?

- a. Yes
- b. No

9. Do you suffer from face mask-induced itch?

- a. Yes
- b. No

10. *[If the answer to the question above is yes]* Evaluate itch severity during the last week on a scale of 0-10 points.

|            |                       |                       |                       |                       |                       |                       |                       |                       |                       |                       |                       |                                             |
|------------|-----------------------|-----------------------|-----------------------|-----------------------|-----------------------|-----------------------|-----------------------|-----------------------|-----------------------|-----------------------|-----------------------|---------------------------------------------|
|            | 0                     | 1                     | 2                     | 3                     | 4                     | 5                     | 6                     | 7                     | 8                     | 9                     | 10                    |                                             |
| No<br>itch | <input type="radio"/> | <input type="radio"/> | <input type="radio"/> | <input type="radio"/> | <input type="radio"/> | <input type="radio"/> | <input type="radio"/> | <input type="radio"/> | <input type="radio"/> | <input type="radio"/> | <input type="radio"/> | The highest<br>intensity you<br>can imagine |

11. How often does the mask strictly cover your mouth and nose at work?

- a. Always/nearly always
- b. Sometimes
- c. Rarely
- d. Never

12. How often do you happen to touch the mask at work?

- a. Always/nearly always
- b. Sometimes
- c. Rarely
- d. Never

13. How often do you take the mask off properly at work (without touching its anterior surface)?

- a. Always/nearly always
- b. Sometimes

- c. Rarely
- d. Never

**14. How often do you clean/disinfect your hands after taking off/touching the mask at work?**

- a. Always/nearly always
- b. Sometimes
- c. Rarely
- d. Never

**15. How often do you replace the mask when it dampens at work?**

- a. Always/nearly always
- b. Sometimes
- c. Rarely
- d. Never

**16. How often do you reuse single-use masks?**

- a. Always/nearly always
- b. Sometimes
- c. Rarely
- d. Never

**17. How often do you dispose of single-use masks after one use at work?**

- a. Always/nearly always
- b. Sometimes
- c. Rarely
- d. Never
